# Supplementary material for: Co-exposure to multi-walled carbon nanotube and lead ions aggravates hepatotoxicity of nonalcoholic fatty liver via inhibiting AMPK/PPARγ pathway
Source: publisher site journal article supplement (doi:10.18632/aging.103430), 2020-07-17
Supplement: Supplementary file [file aging-v12i14-103430-supplementary-material-SD1.pdf]

## SUPPLEMENTARY FIGURES

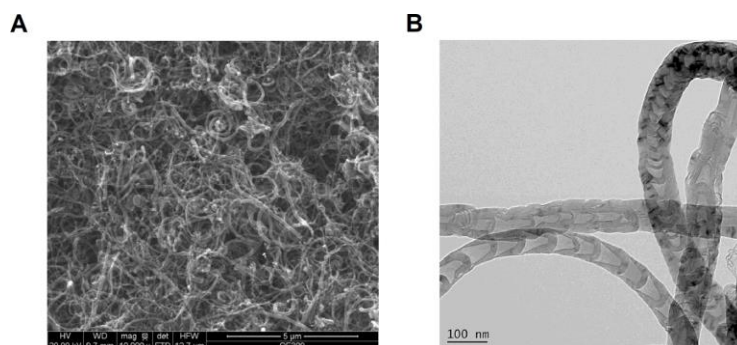

**Supplementary Figure 1. TEM photographs of carboxyl MWCNTs. (A)** a low magnification ( $\times 10000$ ,  $5 \mu\text{m}$ ) and **(B)** a high magnification ( $\times 50000$ ,  $100 \text{nm}$ ).

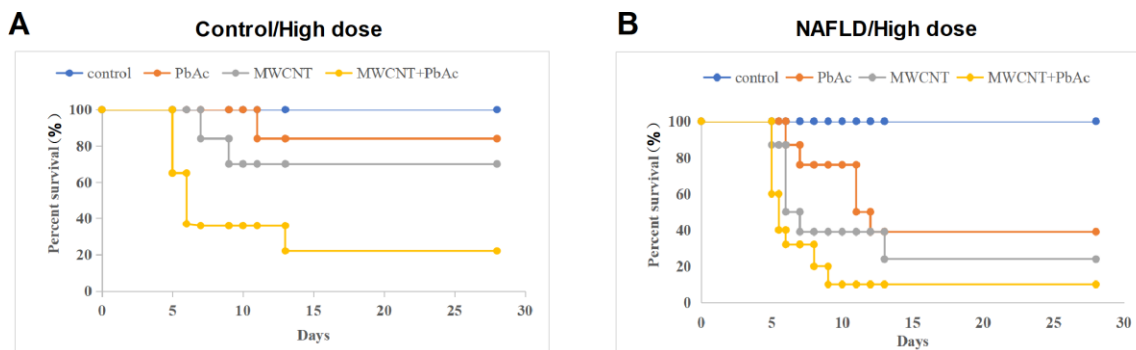

**Supplementary Figure 2. The survival curve of the control and NAFLD mice exposed to the high dose of PbAc, MWCNTs or MWCNTs + PbAc.**
